# Supplementary material for: Two distinct metacommunities characterize the gut microbiota in Crohn's disease patients
Source: PubMed Central journal article supplement (PMC5624284; doi:10.1093/gigascience/gix050), 2017-06-26

# Two distinct metacommunities characterize the gut microbiota in Crohn's disease patients

Qing He<sup>1,2,3†</sup>, Yuan Gao<sup>4,5†</sup>, Zhuye Jie<sup>4,5†</sup>, Xinlei Yu<sup>4,5</sup>, Janne Marie Laursen<sup>6</sup>, Liang Xiao<sup>4,5</sup>, Ying Li<sup>1</sup>, Lingling Li<sup>2</sup>, Faming Zhang<sup>7</sup>, Qiang Feng<sup>4,8</sup>, Xiaoping Li<sup>4,5</sup>, Jinghong Yu<sup>4,5</sup>, Chuan Liu<sup>4,5</sup>, Ping Lan<sup>1,3</sup>, Ting Yan<sup>2</sup>, Xin Liu<sup>4,5</sup>, Xun Xu<sup>4,5</sup>, Huanming Yang<sup>4,9</sup>, Jian Wang<sup>4,9</sup>, Lise Madsen<sup>4,10,11</sup>, Susanne Brix<sup>6</sup>, Jianping Wang<sup>1,3\*</sup>, Karsten Kristiansen<sup>4,10\*</sup>, Huijue Jia<sup>4,5,12\*</sup>

<sup>1</sup>Department of Gastroenterology, The Sixth Affiliated Hospital of The Sun Yat-sen University, Guangzhou 510610, China

<sup>2</sup>Department of nutrition, The Sixth Affiliated Hospital of Sun Yat-sen University, Guangzhou 510610, China

<sup>3</sup>Guangdong Provincial Key Laboratory of Colorectal and Pelvic Floor Diseases, the Sixth Affiliated Hospital, Sun Yat-sen University, Guangzhou 510610, China

<sup>4</sup>BGI-Shenzhen, Shenzhen 518083, China

<sup>5</sup>China National Genebank-Shenzhen, BGI-Shenzhen, Shenzhen 518083, China

<sup>6</sup>Department of Biotechnology and Biomedicine, Technical University of Denmark (DTU), Kongens Lyngby, Denmark.

<sup>7</sup>Digestive Endoscopy and Medical Center for Digestive Diseases, the Second Affiliated Hospital

- 1 19 of Nanjing Medical University, Nanjing 210011, Jiangsu Province, China  
2  
3  
4 20 <sup>8</sup>Shenzhen Engineering Laboratory of Detection and Intervention of Human Intestinal Microbiome,  
5  
6  
7 21 BGI-Shenzhen, Shenzhen 518083, China  
8  
9  
10  
11 22 <sup>9</sup>James D. Watson Institute of Genome Sciences, Hangzhou 310058, China  
12  
13  
14  
15 23 <sup>10</sup>Laboratory of Genomics and Molecular Biomedicine, Department of Biology, University of  
16  
17 24 Copenhagen, Universitetsparken 13, 2100 Copenhagen, Denmark.  
18  
19  
20  
21 25 <sup>11</sup>National Institute of Nutrition and Seafood Research, Bergen, Norway.  
22  
23  
24  
25 26 <sup>12</sup>Shenzhen Key Laboratory of Human Commensal Microorganisms and Health Research,  
26  
27 27 BGI-Shenzhen, Shenzhen 518083, China  
28  
29  
30  
31 28  
32  
33  
34  
35 29 † Contributed equally  
36  
37  
38  
39 30 \* To whom correspondence should be addressed: K.K. ([kk@bio.ku.dk](mailto:kk@bio.ku.dk)) or H.J.  
40  
41 31 ([jiahuijue@genomics.cn](mailto:jiahuijue@genomics.cn))  
42  
43  
44  
45  
46  
47  
48  
49  
50  
51  
52  
53  
54  
55  
56  
57  
58  
59  
60  
61  
62  
63  
64  
65



52 **Keywords:** Crohn's disease, Gut microbe, Metagenomics, Exclusive enteral nutrition

1  
2  
3  
4  
5  
6  
7  
8  
9  
10  
11  
12  
13  
14  
15  
16  
17  
18  
19  
20  
21  
22  
23  
24  
25  
26  
27  
28  
29  
30  
31  
32  
33  
34  
35  
36  
37  
38  
39  
40  
41  
42  
43  
44  
45  
46  
47  
48  
49  
50  
51  
52  
53  
54  
55  
56  
57  
58  
59  
60  
61  
62  
63  
64  
65



1 74 understanding of the functional roles played by the gut microbiota has limited the efforts to  
2  
3 75 devise more targeted treatments.  
4  
5  
6

7 76 Conventionally, CD is treated with anti-inflammatory or immunosuppressive medications, or  
8  
9  
10 77 by surgery if symptoms cannot be improved pharmaceutically <sup>10</sup>. However, side effects and  
11  
12 78 complications such as infection and malnutrition accompany these treatments <sup>11</sup>, which  
13  
14  
15 79 imperil the patient's life. Although not widely used, exclusive enteral nutrition (EEN) is a  
16  
17  
18 80 low-risk, non-invasive therapy for CD that involves exclusive ingestion of 100% liquid  
19  
20  
21 81 formula made up of either elemental or polymeric nutrients <sup>12</sup>. In pediatric CD up to 85%  
22  
23 82 remission has been achieved by EEN <sup>12</sup>. Nevertheless, in adult CD, EEN has not delivered  
24  
25  
26 83 desirable effectiveness, which to some extent may be attributed to non-adherence and  
27  
28  
29 84 interpersonal variations in clinical conditions <sup>12</sup>. The mechanism underlying the alleviation of  
30  
31  
32 85 CD by EEN also remains unclear, though nutritional improvement and microbial involvement  
33  
34  
35 86 possibly play a role <sup>13</sup>. Although previous studies have described the effects of EEN on the  
36  
37  
38 87 microbiota of pediatric CD<sup>9,14</sup>, it is unclear how EEN modulates their adult counterpart.  
39  
40

41 88 Through metagenomic sequencing and data analysis, we herein provide novel insights into the  
42  
43  
44 89 CD microbiota at both compositional and inferred functional levels. We identified two  
45  
46  
47 90 metacommunity stages within CD patients that differed by abundance of gram-negative  
48  
49  
50 91 pro-inflammatory bacteria and presence of genes involved in production of anti-inflammatory  
51  
52  
53 92 short-chain fatty acids. In addition, we investigated the effect of short-term EEN on the CD  
54  
55  
56 93 microbiota. Our study highlights the presence of two microbiota severity-states related to gut  
57  
58  
59 94 microbiota dysbiosis in CD and indicates possible functional links between the microbiota  
60  
61  
62  
63  
64  
65

95 and the underlying immunological dysbalance in CD.

1  
2  
3  
4  
5  
6  
7  
8  
9  
10  
11  
12  
13  
14  
15  
16  
17  
18  
19  
20  
21  
22  
23  
24  
25  
26  
27  
28  
29  
30  
31  
32  
33  
34  
35  
36  
37  
38  
39  
40  
41  
42  
43  
44  
45  
46  
47  
48  
49  
50  
51  
52  
53  
54  
55  
56  
57  
58  
59  
60  
61  
62  
63  
64  
65

1      96      **Data Description**

2  
3  
4      97      49 CD patients and 54 healthy controls (CTs) were enrolled in this study. 14 CD patients  
5  
6  
7      98      underwent EEN treatment (for the clinical profiles of CD patients, see Supplementary Table  
8  
9  
10     99      1). Fecal samples were collected from all participants at baseline and from the EEN-treated  
11  
12  
13     100     patients after two-week EEN treatment, totaling 117 fecal samples. After DNA extraction,  
14  
15     101     DNA library of an insert size of 350bp was constructed and then sequenced on an Illumina  
16  
17     102     HiSeq 2000 analyzer at BGI (Shenzhen, China) using 100bp paired-end (PE) sequencing. In  
18  
19  
20  
21     103     total, we generated ~700Gb raw data, and 672Gb of them remained after filtering out  
22  
23  
24     104     low-quality or host reads. The dataset is available from the EBI Database. On average ~55.65  
25  
26     105     million high-quality reads per sample were generated for further analyses. The proportion of  
27  
28     106     high-quality reads among all raw reads from each sample was 95.98% on average. Using both  
29  
30     107     de novo assembly and alignment against the integrated gene catalog (IGC) geneset, 2036584  
31  
32     108     genes with occurrence rate over 5% were obtained.

33  
34  
35  
36  
37  
38     109     **Analyses**

39  
40  
41  
42     110     **Clustering of CD microbiota into distinct metacommunities**

43  
44  
45  
46     111     When the gut microbiotas of CD patients were compared to their non-CD counterparts, both  
47  
48     112     microbial gene counts (**Supplementary Fig. 1a**) and diversity (**Supplementary Fig. 1b**) were  
49  
50     113     considerably lower in CD patients than in CTs. For high-confidence taxonomic identification,  
51  
52     114     co-abundant genes were binned into metagenomics species (MGS)<sup>15</sup> (harboring more than  
53  
54     115     700 genes) which were thereafter used for taxonomic annotation. A total of 452 MGS were  
55  
56  
57  
58  
59  
60  
61  
62  
63  
64  
65



1 116 identified, with 151 of them being assigned to existing taxonomic entities (**Supplementary**  
2  
3 117 **Table 2**).

4  
5  
6  
7 118 To capture the principal differences between non-CD and CD microbiome structures, we  
8  
9  
10 119 adopted a combinatory approach which started with sample clustering based on the dirichlet  
11  
12 120 multinomial mixtures (DMM) model <sup>16</sup>, followed by the identification of discriminative  
13  
14 121 microbes using an adapted version of the linear discriminant analysis (LDA) effect size  
15  
16 122 (LEfSe) method <sup>17</sup>. Based on Laplace approximation <sup>16</sup>, we identified 3 clusters to exhibit  
17  
18 123 minimal negative log posterior (**Supplementary Fig. 1c**). Based on this we clustered the  
19  
20  
21 124 microbiome samples of CD and CTs into 3 metacommunities (A, B and C), which displayed  
22  
23 125 intra-community homogeneity and inter-community dissimilarity (**Fig. 1a**). The membership  
24  
25 126 of a metacommunity was associated with disease status (Fisher's exact test with BH  
26  
27 127 adjustment,  $q < 0.01$ , **Supplementary Table 3**). Metacommunity A was dominated by CT  
28  
29 128 samples and metacommunity C exclusively by CD samples, whereas metacommunity B  
30  
31 129 contained both CT and CD samples (**Fig. 1a**). Based on a less stringent LEfSe method, 85  
32  
33 130 MGS were identified as discriminative microbes for the metacommunities or sub-groups (CT  
34  
35 131 and CD groups within metacommunity B) (**Fig. 1a** and **Supplementary Table 4**). The  
36  
37 132 majority of metacommunity A-enriched MGSs were reduced in metacommunity B and further  
38  
39 133 depleted in C, including short-chain fatty acid (SCFA)-producing bacteria such as  
40  
41 134 *Bifidobacterium* species, *Faecalibacterium prausnitzii*, *Alistipes shahii* and *Roseburia* species  
42  
43 135 (**Fig. 1a** and **Supplementary Table 4**). Among others, SCFA-producing bacteria *Bacteroides*  
44  
45 136 *cellulosilyticus*, *Bacteroides xylanisolvens*, and *Clostridium nexile*, a member of the  
46  
47  
48  
49  
50  
51  
52  
53  
54  
55  
56  
57  
58  
59  
60  
61  
62  
63  
64  
65

1 137 immunomodulatory Clostridium cluster XIVa<sup>18</sup>, were enriched in metacommunity B (**Fig. 1a**  
2  
3  
4 138 and **Supplementary Table 4**). Another Clostridium cluster XIVa clade member, *Clostridium*  
5  
6 139 *symbiosum*, and a number of opportunistic pathogens such as *E. coli*, *Klebsiella pneumoniae*,  
7  
8  
9 140 *Streptococcus salivarius*, and *Clostridium bolteae* were overrepresented in metacommunity C  
10  
11  
12 141 (**Fig. 1a** and **Supplementary Table 4**), suggesting that subjects in this group had impaired  
13  
14 142 ability to suppress colonization by pathogenic species in their gut. We also evaluated whether  
15  
16  
17 143 metacommunities differed in the degree of dysbiosis associated with CD through computing  
18  
19  
20 144 the Microbial Dysbiosis index (MD-index)<sup>5</sup>. CD microbiotas from metacommunity C had  
21  
22  
23 145 significantly higher values of the MD-index than those from metacommunity B ( $p = 7.63e-05$ ,  
24  
25 146 **Fig. 1a** and **Supplementary Table 1**), suggesting a more severe degree of dysbiosis in this  
26  
27  
28 147 CD subgroup. Combined, these compositionally distinct metacommunities recapitulate  
29  
30  
31 148 disparate configurations of the microbiota under normal and CD conditions.  
32  
33  
34  
35 149 The separation of microbiomes into metacommunities was confirmed by principal coordinate  
36  
37  
38 150 analysis (PCoA), which clustered samples by both metacommunity identity and disease status  
39  
40  
41 151 (**Fig. 1b**). We determined whether the variations in microbiome composition were  
42  
43 152 accompanied with clinical phenotypes. In CD patients, 23 clinical variables together with age  
44  
45  
46 153 correlated with microbiome variation, with uric acid (UA) and blood leukocyte numbers  
47  
48  
49 154 being the top two covariates (effect size > 0.2) (**Supplementary Fig. 2b**). When categorized  
50  
51  
52 155 into groups, various plasma biomarkers, including inflammatory markers were the strongest  
53  
54 156 classes of covariates (effect size > 0.2) (**Supplementary Fig. 2c**). However, despite the  
55  
56  
57 157 existence of microbiome variations and their correlation with clinical states, no significant  
58  
59  
60  
61  
62  
63  
64  
65

1 158 differences were detected for these clinical variables between metacommunity B and C CD  
2  
3 159 patients (**Supplementary Fig. 2d**).

4  
5  
6  
7 160

8  
9  
10  
11 161 **CD- and metacommunity-associated functional traits**

12  
13  
14 162 We next analyzed the functional changes associated with disease status and differences in  
15  
16  
17 163 microbiome structure. We made pair-wise comparisons after performing functional annotation  
18  
19  
20 164 using the Kyoto Encyclopedia of Genes and Genomes (KEGG) database. A large number of  
21  
22  
23 165 CD- and metacommunity-related functional shifts were identified at the level of pathways and  
24  
25  
26 166 modules (**Fig. 2a, Supplementary Table 5 and Supplementary Table 6**). We observed  
27  
28  
29 167 consistent changes in CD microbiotas in all within- or between- metacommunity comparisons  
30  
31  
32 168 (in B-CD vs A-CT, C-CD vs A-CT, B-CD vs B-CT, and C-CD vs B-CT) (**Fig. 2a**). The  
33  
34  
35 169 composition of the microbiota of CD patients indicated consistent changes in the potential for  
36  
37  
38 170 carbohydrate utilization compared to the CT counterparts with a decreased abundance of  
39  
40  
41 171 pathways involved in starch and sucrose metabolism, and enrichment of pathways involved in  
42  
43  
44 172 simple carbon metabolism such as fructose, mannose, and galactose in the microbiota of CD  
45  
46  
47 173 patients (**Fig. 2a**). In addition, we observed an enrichment of genes in pathways involved in  
48  
49  
50 174 glyoxylate, dicarboxylate, propanoate and butanoate metabolism as well as in pathways  
51  
52  
53 175 involved in transport of simple sugars (phosphotransferase system) (**Fig. 2a**). Interestingly,  
54  
55  
56 176 the reporter scores of numerous amino acid metabolic pathways exhibited marked decreases  
57  
58  
59 177 or increases in CD patients compared to CTs, suggesting possible significant changes in the  
60  
61  
62 178 amino acid metabolic profiles (**Fig. 2a**). Of note, the potential for methane metabolism was

179 also diminished in CD patients (**Fig. 2a**). By contrast, microbes in CD patients exhibited  
180 enhanced potential for xenobiotic degradation (e.g. of toluene, fluorobenzoate, styrene,  
181 benzoate, dioxin, and xylene) and antioxidant defense (e.g. ascorbate, aldarate and glutathione  
182 metabolism) (**Fig. 2a**). In parallel, a number of pathways associated with pathogenesis and  
183 virulence, including ABC transporters, bacterial secretion system, and general LPS  
184 biosynthesis exhibited an incremental enrichment from metacommunity A to C (**Fig. 2a**).  
185 LPS, an inherent component of Gram-negative bacteria, is an endotoxin that can have  
186 opposing effects on the immune response<sup>19</sup>. Since pathway and module analyses showed an  
187 enrichment of general LPS biosynthesis in the CD microbiome (**Fig. 2a**), we took a novel  
188 approach and investigated the capacity amongst all Gram-negative bacteria to produce the  
189 pro-inflammatory hexa-acylated LPS as compared to the antagonizing silencing  
190 penta-acylated LPS variant<sup>20,21</sup>. We listed bacteria with a potential for synthesizing each LPS  
191 variant (**Supplementary Table 7**) and compared the abundances of these bacteria  
192 (**Supplementary Table 8**). The hexa-acylated LPS producing bacteria, *E. coli* and  
193 *Morganella morganii* exhibited higher abundance in CD patients from metacommunity C  
194 compared to non-CD individuals from metacommunity A (**Supplementary Table 7**).  
195 Consistently, compared to metacommunity A (CT), microbes in metacommunity C (CD)  
196 tended to produce LPS in a higher hexa- to penta-ratio, suggested by the increase in  
197 abundance of bacteria with the hexa- over the penta-acetylated LPS variant (**Fig. 2b**), which  
198 in part may account for an increased inflammatory stimulation of the CD gut.  
199 The abundances of Gram-positive bacteria were reduced in metacommunity C, and in

1 200 metacommunity B as compared to CTs (**Fig. 2b**). These bacteria make up the largest reservoir  
2  
3 201 for production of SCFAs. SCFAs are not only colonotrophic nutrients but also  
4  
5 202 immunoregulatory molecules <sup>22</sup> that may reduce pro-inflammatory cues within the gut  
6  
7 203 environment. We estimated the abilities of the metacommunities to produce the SCFAs acetic  
8  
9 204 acid, propionic acid and butyric acid. This was done based on the presence of the genes  
10  
11 205 encoding the last enzyme within the respective biosynthetic pathway, thereby providing an  
12  
13 206 alternative method for predicting the capacity for biosynthesis of the bioactive end products  
14  
15 207 than that used in **Fig. 2a**, which was based on presence of genes involved in overall metabolic  
16  
17 208 pathways. Bacteria with a potential to produce SCFAs are listed in **Supplementary Table 7**.  
18  
19 209 Evidently, CD microbiotas, particularly those in metacommunity C, showed a decreased  
20  
21 210 abundance of key genes for SCFA production, including acetic acid, propionic acid and  
22  
23 211 butyric acid, when compared to the CT microbiota in metacommunity A (**Fig. 2c**).  
24  
25 212 Concordantly, the abundance of many SCFA-producing bacteria differed between CT and CD  
26  
27 213 samples (**Supplementary Table 8**). Thus, the gut microbiota in CD patients likely produces a  
28  
29 214 suboptimal amount of SCFAs compared to the healthy state.  
30  
31  
32  
33  
34  
35  
36  
37  
38  
39  
40  
41  
42

43 215

#### 46 216 **Disruption of normal gut microbial ecosystem and bacterial growth rate in CD**

47  
48  
49  
50 217 The structure of a microbiota is the result of dynamic interactions between community  
51  
52 218 members. We generated correlation-based microbial interaction networks using the SparCC  
53  
54 219 algorithm (**Fig. 3, Supplementary Fig. 3**). Since metacommunity A and C were  
55  
56 220 representative of the typical CT and CD states, respectively, we first compared the  
57  
58  
59  
60

1 221 microbiome networks of these two groups (**Fig. 3a** and **3b**). The control microbiota in  
2  
3 222 metacommunity A was characterized by a complex network of interactions between different  
4  
5  
6 223 taxa, especially within or between the dominant phyla Bacteroidetes and Firmicutes (**Fig. 3a**).  
7  
8  
9 224 However, the vast majority of these relationships was no longer significant in the CD patients  
10  
11 225 harboring metacommunity C (**Fig. 3b**). Among the strong interactions lost in the gut  
12  
13 226 microbiota of the C-CD group were positive correlations ( $r>0.5$ ) of *Bacteroides*  
14  
15  
16 227 *cellulosilyticus* with *Bacteroides thetaiotaomicron* and *Bacteroides* sp., and of *Ruminococcus*  
17  
18  
19 228 *bromii* with *Eubacterium ventriosum* (**Fig. 3**). Only one new strong correlation was formed  
20  
21 229 between two unidentified taxa in the C-CD group (**Fig. 3**). Thus, the CD microbiota of  
22  
23 230 metacommunity C showed not only alterations in composition, but also reduced  
24  
25  
26 231 interrelationships. In comparison, CT and CD microbiotas from metacommunity B did not  
27  
28  
29 232 differ significantly in terms of network complexity, although numerous inter-taxon  
30  
31  
32 233 relationships were altered (**Supplementary Fig. 3**).  
33  
34  
35  
36  
37 234 Changes in bacterial growth rate may contribute to alterations in community structures. We  
38  
39 235 calculated the growth rate from the number of sequencing reads covering the replication  
40  
41  
42 236 origin relative to reads covering the replication termination site <sup>23</sup>. Compared to CTs in  
43  
44  
45 237 metacommunity A, the growth rate of many beneficial taxa decreased in metacommunity C,  
46  
47  
48 238 including the SCFA-producing bacteria *Alistipes finegoldii*, *Alistipes shahii*, *Eubacterium*  
49  
50  
51 239 *rectale*, *Roseburia intestinalis*, and several *Faecalibacterium prausnitzii* strains (**Fig. 3** and  
52  
53  
54 240 **Supplementary Table 9**). Interestingly, certain pathogenic or opportunistic pathogenic  
55  
56  
57 241 bacteria exhibiting an increased abundance in the C-CD group showed high growth rates (*E.*

1 242 *coli*, *Klebsiella pneumoniae*, *Bacteroides fragilis*, and *Streptococcus salivarius*) (**Fig. 3** and  
2  
3 243 **Supplementary Fig. 4** and **Supplementary Table 9**). Thus, differences in growth rate likely  
4  
5  
6 244 contribute to the alterations in the relative abundance of bacteria in CTs and CD patients,  
7  
8  
9 245 since the observed increase or decrease in growth rates largely concurred with their changes  
10  
11 246 in relative abundance in CD samples (**Supplementary Fig. 4**). The reduction of growth rates  
12  
13  
14 247 for most bacteria in the C-CD group may also be an indicator that this metacommunity  
15  
16  
17 248 structure is unlikely to shift towards increased diversity over time without specific  
18  
19  
20 249 intervention.

#### 250 **Limited remodeling of CD microbiota composition by short-term EEN**

251 Fourteen patients in our cohort underwent EEN treatment after baseline sampling and  
252 provided fecal samples after two weeks of treatment. We assessed whether short-term EEN  
253 was sufficient to alter the microbiome structure in CD patients. For all patients but one  
254 (GZCD029, marked by \* in **Fig. 4b**), such short time intervention proved insufficient to  
255 change their metacommunity identities (**Fig. 4a**), in accord with no significant change in  
256 MD-indices ( $p = 0.20$ , **Fig. 4a** and **Supplementary Table 1**). However, moderate changes  
257 occurred as illustrated by the shift in the relative position of microbiomes along the two  
258 principal coordinates within pre-identified clusters (**Fig. 4b**).

259 Despite the limited remodeling of the overall microbiota composition, two-weeks EEN did  
260 induce a variety of functional alterations (**Fig. 4c**, and **Supplementary Table 12** and  
261 **Supplementary Table 13**). In a reverse manner to CD-associated shifts, functions such as  
262 LPS biosynthesis and bacterial secretion system became less enriched, while starch and

1 263 sucrose metabolism and flagellar assembly were enhanced after EEN (**Fig. 4c**), suggesting a  
2  
3 264 partial functional recovery. However, certain CD-driven changes, such as functions associated  
4  
5  
6 265 with ribosomes, one carbon folate pool, PTS, and ABC transporters, were exacerbated after  
7  
8  
9 266 two-weeks EEN (**Fig. 4c**), indicating either side effects or temporal disease progression.  
10  
11 267 Nevertheless, short-term EEN did not affect the abundances of LPS- or SCFA-producing  
12  
13 268 bacteria (**Fig 4d, e, Supplementary Table 10**) nor their growth rates (**Supplementary Table**  
14  
15  
16  
17 269 **11**). However, network re-wiring occurred (**Supplementary Fig. 5**). Rather than interacting  
18  
19  
20 270 with Firmicutes, bacteria from Bacteroidetes tended to interact with each other after EEN  
21  
22 271 treatment (**Supplementary Fig. 5**). By contrast, a majority of Firmicutes in patients after  
23  
24  
25 272 EEN treatment presented more inter-dependences with Proteobacteria and unclassified  
26  
27  
28 273 species compared to those before treatment (**Supplementary Fig. 5**). Overall, the CD  
29  
30  
31 274 microbiota appeared relatively stable and refractory to two-week EEN intervention. Future  
32  
33  
34 275 studies will need to determine if a longer intervention period with EEN will result in  
35  
36 276 restoration of normal functional microbiota in CD patients.

37  
38  
39 277  
40  
41  
42  
43  
44  
45  
46  
47  
48  
49  
50  
51  
52  
53  
54  
55  
56  
57  
58  
59  
60  
61  
62  
63  
64  
65



1       278    **Discussion**

2  
3  
4       279    Comparative metagenomic analysis of fecal samples from CD and healthy controls revealed  
5  
6  
7       280    pronounced global alterations in the fecal microbiota of CD patients, characterized by two  
8  
9  
10      281    distinct CD metacommunities comprising gradually limited bacterial diversity, by functional  
11  
12      282    aberrations towards a pronounced pro-inflammatory phenotype, and by structural  
13  
14      283    derangements of ecosystem networks.

15  
16  
17  
18  
19      284    Metacommunities constitute a robust means to distinguish microbiotas with different traits  
20  
21  
22      285    and of distinct natures. Suggested by their signature microbes (the leverage between  
23  
24      286    beneficial bacteria or opportunistic pathogens) and supported by the MD-index,  
25  
26  
27      287    metacommunity A might be representative of the healthy gut, while metacommunity B and C  
28  
29  
30      288    likely represented a moderately imbalanced and a more pro-inflammatory state associated  
31  
32      289    with CD, respectively. Since the commensal microbiota is closely linked to the health of the  
33  
34      290    host, the classification of metacommunities is a novel promising tool to stratify patients based  
35  
36      291    on their microbiome configuration.

37  
38  
39  
40  
41      292    Our study identified systematic functional alterations of CD microbiome that reflected the  
42  
43      293    stressful microenvironment of the CD gut and its predisposition to inflammation. In this  
44  
45      294    respect, the decline in the potential for the biosynthesis of all SCFAs, which may modulate  
46  
47      295    the activation of the immune system and temper inflammation <sup>24,25</sup>, and the appearance of  
48  
49      296    microbes producing the pro-inflammatory hexa-acetylated LPS <sup>19</sup> are salient manifestations of  
50  
51      297    the inflammation-prone nature of the CD microbiota. Although LPS has long been established  
52  
53      298    as a pathogen-associated molecular pattern (PAMP) that triggers immune cascades <sup>19</sup>, it was  
54  
55  
56  
57  
58  
59  
60  
61  
62  
63  
64  
65

1 299 more recently established that only the hexa-acylated LPS variant is able to activate  
2  
3 300 pro-inflammatory cues via TLR4 in humans <sup>21</sup>, while the penta-acylated LPS variant acts as  
4  
5  
6 301 an antagonist <sup>20</sup>. Our finding that the CD microbiota of metacommunity C was enriched in  
7  
8  
9 302 microbes producing hexa-acylated LPS is consistent with previous observations of the  
10  
11 303 increased abundance of the *Enterobacteriaceae* family members in CD <sup>4-8</sup>, which are known  
12  
13 304 to stimulate inflammation <sup>26</sup>. Together, these changes may severely affect the host immune  
14  
15  
16 305 system, leading to an unchecked inflammatory state in CD. The reduction in the network  
17  
18  
19 306 complexity of the CD microbiota of metacommunity C reinforced the view that a globally  
20  
21 307 disturbed microbial ecosystem may contribute to this disease. The loss of reciprocal and  
22  
23  
24 308 cross-inhibitory relationships may impair the survival of beneficial microbes and create  
25  
26  
27  
28 309 favorable conditions for the blooming of pathogens. Likewise, it appears to limit [the](#) growth  
29  
30  
31 310 of many gut bacteria found in healthy individuals. In this regard, reconstruction of the normal  
32  
33  
34 311 ecosystem and not only the mere introduction of a single or several commensal microbes may  
35  
36 312 be needed to curb CD. In the case of EEN, a longer term of treatment may be needed to  
37  
38  
39 313 achieve this goal. Analysis of the fecal microbiota is widely used as a proxy for studying the  
40  
41  
42 314 gut microbiota composition because of the easiness and noninvasive nature of fecal sampling,  
43  
44  
45 315 and has through the years resulted in deepening the understanding of the relationship between  
46  
47  
48 316 the gut microbiota and IBD <sup>1,6</sup>. However, new avenues of sampling procedures open up for  
49  
50  
51 317 more comprehensive insights into the role played by the intestinal location of microbial  
52  
53 318 species (luminal or mucosal layer attachment to the small and the large intestine) that, in  
54  
55  
56 319 combination with metagenomic sequencing, would allow for deeper insights into the  
57  
58  
59 320 inter-individual diversity in ecological dysbalance in CD patients in future studies.

1 321 Taken together, our metagenome-scale characterization of the CD gut microbiome supports  
2  
3 322 the notion of a shift towards enhanced pro-inflammatory capacity, which is most pronounced  
4  
5  
6 323 in individuals harboring the severe-state metacommunity C. The level of details in this  
7  
8  
9 324 analysis, also encompassing yet unannotated bacteria, may pave the way for elucidating  
10  
11 325 microbial disturbances predictive for CD by enabling the discovery of composite microbial  
12  
13  
14 326 CD biomarkers. In addition, it may allow for the identification of future therapeutic targets  
15  
16  
17 327 based on microbiota signatures, thereby implementing personalized medicine to CD patients  
18  
19  
20 328 based on the individual microbiome composition.

21  
22  
23 329  
24  
25

## 26 330 **Methods**

### 27 28 29 30 331 **Study cohort, EEN treatment and sample collection**

31  
32  
33  
34 332 49 CD patients and 54 healthy controls were enrolled in this study at the Sixth Affiliated  
35  
36  
37 333 Hospital of the Sun Yat-sen University, Guangdong, China. All patients met the diagnostic  
38  
39  
40 334 criteria for CD, according to the Montreal classification system <sup>27</sup>. Patients diagnosed with  
41  
42  
43 335 diabetes, tumor, cardiovascular, kidney, liver, and metabolic diseases were excluded from this  
44  
45 336 study.

46  
47  
48 337

49  
50 338 Among these participants, 14 CD patients underwent EEN treatment. ENSURE® (Abbott  
51  
52  
53 339 Laboratories, Abbott Park, USA), PEPTISON®, NUTRISON POWDER® (NUTRICIA,  
54  
55  
56 340 Danone, Netherlands) and FRESUBIN® (Sino-Swed Pharmaceutical Corp. Ltd, China) were  
57  
58  
59 341 used as the standard oral polymeric formulas, and their ingredients are detailed in

1 342 Supplementary Table 14. Patients chose from these formulas, with 8 patients selecting  
2  
3 343 ENSURE® and the others selecting a mixture of two or more formulas. Formulas were  
4  
5  
6 344 consumed at 30 kcal/kg per day as the sole nutrient source. Patients who adhered to EEN  
7  
8  
9 345 treatment had their lesion healed.

10  
11 346

12  
13  
14 347 Fecal samples were collected from all participants at baseline (n=103), and from the  
15  
16  
17 348 EEN-treated CD patients after 2 weeks of treatment (n=14), totaling 117 samples. The fecal  
18  
19  
20 349 samples were immediately frozen and stored at -80°C until being processed. DNA extraction  
21  
22  
23 350 was performed according to the protocols described previously <sup>28</sup>.

24  
25 351

26  
27  
28 352 All protocols in this study were approved by the institutional review boards at Sixth Affiliated  
29  
30  
31 353 Hospital of Sun Yat-sen University and BGI-Shenzhen, and they were conducted in  
32  
33  
34 354 compliance with the Declaration of Helsinki. Explicit informed consent was obtained from all  
35  
36  
37 355 subjects.

38  
39 356

### 40 41 42 43 357 **Metagenomic sequencing and assembly**

44  
45  
46 358 Paired-end metagenomic sequencing was conducted on the Illumina platform (insert size, 350  
47  
48  
49 359 bp; read length, 100 bp). Quality control was performed and adaptor and host contamination  
50  
51  
52 360 were filtered. Sequencing reads were de novo assembled into contigs with SOAPdenovo  
53  
54  
55 361 v2.04 <sup>29</sup> as described previously <sup>28</sup>.

56  
57  
58 362

1 **363 Co-abundance gene groups identification and functional annotation**

2  
3  
4 364 Applying the metagenomic species (MGS) clustering method <sup>15</sup>, we clustered genes according  
5  
6  
7 365 to their co-variations in abundance across samples. A group of co-abundant genes was  
8  
9  
10 366 identified as a MGS if it contained 700 or more genes. These MGSs were subjected to  
11  
12  
13 367 subsequent analysis. Taxonomic assignment of the mapped genes was performed according to  
14  
15  
16 368 the Integrated Microbial Genomes (IMG, v400) database using an in-house pipeline detailed  
17  
18 369 previously <sup>28</sup>, with 70% overlap and 65% identity for assignment to phylum, 85% identity to  
19  
20  
21 370 genus, and 95% identity to species. The relative abundance of a co-abundance gene group was  
22  
23  
24 371 calculated from the relative abundance of its genes.

25  
26 372 Differentially enriched KO pathways or modules were identified according to their reporter  
27  
28  
29 373 scores <sup>30</sup>, which were calculated from the Z-scores of individual KOs.

30  
31  
32 374 We assessed the production capacity for the two LPS forms based on the abundances of genes  
33  
34  
35 375 of the entire lipid A biosynthesis pathway, and separated them into penta-acylated LPS  
36  
37  
38 376 producers (harboring all lipid A pathway genes except for LpxM), and pro-inflammatory  
39  
40  
41 377 hexa-acylated LPS producers (all lipid A pathway genes). MGSs with no lipid A pathway  
42  
43  
44 378 genes were assigned as Gram-positive bacteria.

45  
46 379 Sequences of SCFA-producing enzymes were retrieved as previously described <sup>31</sup>. Genes in  
47  
48  
49 380 the reference gut microbiome gene catalog<sup>32</sup> were identified as these enzymes (best match  
50  
51  
52 381 according to BlastP, identity > 35%, score > 60, E<1e-3), and their relative abundances could  
53  
54  
55 382 then be determined accordingly.

56  
57 383

1 384  **$\alpha$ -Diversity and gene count**

2  
3  
4 385  $\alpha$ -Diversity (within-sample diversity) was calculated on the basis of the gene profile of each  
5  
6  
7 386 sample according to the Shannon index as described previously <sup>28</sup>. The total gene count in  
8  
9  
10 387 each fecal sample was determined as in ref. <sup>33</sup>. Genes with at least one mapped read were  
11  
12  
13 388 considered present.

14  
15 389

16  
17  
18  
19 390 **PERMANOVA of the influence of clinical and lifestyle factors**

20  
21  
22  
23 391 Permutational multivariate analysis of variance (PERMANOVA) <sup>28</sup> was performed on the  
24  
25  
26 392 gene-abundance profiles of the samples to assess the effect of each of the factors listed in  
27  
28  
29 393 Table 1. We used Bray-Curtis distance and 9,999 permutations in R (3.10, vegan package) <sup>34</sup>.

30  
31 394

32  
33  
34 395 **Details of LEfSe algorithm**

35  
36  
37  
38 396 Differential abundance analyses were performed using the LEfSe algorithm to identify feature  
39  
40  
41 397 microbes whose abundances differed at least in one comparison <sup>5</sup>. Metacommunities and  
42  
43  
44 398 subgroups in metacommunity B were included for comparisons. The biomarker relevance was  
45  
46  
47 399 ranked according to bootstrapped (n=30) logarithmic linear discriminant analysis scores of at  
48  
49 400 least 2.

50  
51 401

52  
53  
54  
55 402 **Effect size analysis**

1 403 24 metadata covariates and their combined effect size when pooled into the broader  
2  
3 404 predefined categories (blood fat, coagulation, inflammation markers, and plasma biomarkers)  
4  
5  
6 405 was estimated with the *bioenv* function in the vegan R package, which selects the  
7  
8  
9 406 combination of covariates with strongest correlation to microbiota variation (Pearson  
10  
11  
12 407 correlation between Gower distances of covariates and microbiome Bray-Curtis dissimilarity,  
13  
14 408 Supplementary Fig. 2A).

15  
16  
17 409

#### 20 21 410 **Correlation network inferred by phylogenetic marker genes**

22  
23 411 Eighty-five MGS, which were previously selected via the detection of microbial community  
24  
25  
26 412 clusters through DMM modelling, were subjected to compositionality data analysis using the  
27  
28  
29 413 SparCC algorithm<sup>35</sup>. Taxon–taxon correlation coefficients were estimated as the average of  
30  
31  
32 414 20 inference iterations with the strength threshold of 0.25. Correlations with the  
33  
34  
35 415 corresponding empirical P values less than 0.01 were retained, which was calculated via a  
36  
37  
38 416 total of 10,000 simulated data sets. This set of iterative procedures was applied separately to  
39  
40  
41 417 data from CTs and CD patients, and to patients’ data before and after EEN to infer the  
42  
43  
44 418 correlation values. Correlation coefficients with magnitude of 0.3 or above were selected for  
45  
46 419 visualization in Cytoscape (version 3.3.0).

47  
48  
49 420

#### 50 51 421 **Availability and requirements**

52  
53  
54 422 Project name: Kruskal.EffectSize.R

55  
56  
57 423 Project home page: <https://github.com/andriaYG/LDA-EffectSize>

1 424 Operating system: Linux

2  
3 425 Programming language: R

4  
5  
6 426 Other requirements: N/A

7  
8  
9 427 License: N/A

10  
11 428 **Availability of supporting data**

12  
13  
14 429 The data sets supporting the results of this article are available in the GigaDB repository, on  
15  
16  
17 430 the ....

18  
19  
20 431 **List of abbreviations**

21  
22 432 CD, Crohn's disease; CT, controls; EEN, exclusive enteral nutrition; IBD, inflammatory

23  
24  
25 433 bowel disease; GI, gastrointestinal; AIEC, adherent-invasive *Escherichia coli*; MAP,

26  
27  
28 434 *Mycobacterium avium paratuberculosis*; MGS, metagenomics species; LDA, linear

29  
30  
31 435 discriminant analysis; LEfSe, linear discriminant analysis effect size; MD-index, microbial

32  
33  
34 436 dysbiosis index; PCoA, principal coordinate analysis; UA, uric acid; KEGG, Kyoto

35  
36  
37 437 Encyclopedia of Genes and Genomes; LPS, lipopolysaccharide; SCFA, short-chain fatty acid;

38  
39 438 PAMP, pathogen-associated molecular pattern; IMG, Integrated Microbial Genomes.

40  
41  
42 439 **Competing interests**

43  
44  
45 440 The authors declare that they have no competing interests

46  
47 441 **Funding**

48  
49  
50 442 This research was supported by the National Natural Science Foundation of China (Nos

51  
52  
53 443 81470795), the Shenzhen Municipal Government of China (grant No. DRC-SZ[2015]162,

54  
55  
56 444 JSGG20140702161403250, JSGG20160229172752028, JCYJ20160229172757249,

57  
58  
59 445 JCYJ20140418095735538, CXZZ20150330171521403, CXB201108250098A).



1 446

2  
3 447 **Authors' contributions**

4  
5  
6 448 All authors read and approved the final manuscript. Q.H., Jian W., Huanming Y., X.X. and  
7  
8  
9 449 X.L. conceived the study. Q.H. participated in the design of the study. L.X., Y.L., L.L, Faming  
10  
11  
12 450 Z., Q.F., Xiaoping L., J.Y., C.L., J.C., and T.Y. carried out the sample collection and  
13  
14  
15 451 preparation. Y.G. and Z.J. participated in sequence assembly, gene mapping and MGS  
16  
17  
18 452 identification. J.M.L. and S.B. performed the analysis of LPS variants. Z.J. generated the  
19  
20  
21 453 SCFA abundance profile. Y.G. carried out the bioinformatics analysis of metacommunities,  
22  
23  
24 454 functions and networks. Y.G., X.Y., L.M, S.B., K.K. and H.J. wrote the manuscript. K.K., S.B.  
25  
26 455 and H.J. supervised project.

27  
28 456 **Acknowledgements**

29  
30  
31 457 We gratefully acknowledge colleagues at BGI-Shenzhen for DNA extraction, library  
32  
33  
34 458 construction, sequencing, and discussions.

35  
36  
37 459  
38  
39 460 **References**

- 40  
41  
42  
43 461 1 Round, J. L. & Mazmanian, S. K. The gut microbiota shapes intestinal immune  
44  
45 462 responses during health and disease. *Nat Rev Immunol* **9**, 313-323,  
46  
47 463 doi:10.1038/nri2515 (2009).  
48  
49  
50  
51 464 2 Barnich, N. & Darfeuille-Michaud, A. Adherent-invasive *Escherichia coli* and Crohn's  
52  
53 465 disease. *Curr Opin Gastroenterol* **23**, 16-20, doi:10.1097/MOG.0b013e3280105a38  
54  
55  
56 466 (2007).  
57  
58  
59  
60  
61  
62  
63  
64  
65

1 467 3 Hermon-Taylor, J. *et al.* Causation of Crohn's disease by *Mycobacterium avium*  
2  
3 468 subspecies *paratuberculosis*. *Can J Gastroenterol* **14**, 521-539 (2000).  
4  
5  
6 469 4 Ricanek, P. *et al.* Gut bacterial profile in patients newly diagnosed with  
7  
8 470 treatment-naive Crohn's disease. *Clin Exp Gastroenterol* **5**, 173-186,  
9  
10 471 doi:10.2147/CEG.S33858 (2012).  
11  
12  
13  
14 472 5 Gevers, D. *et al.* The treatment-naive microbiome in new-onset Crohn's disease. *Cell*  
15  
16 473 *Host Microbe* **15**, 382-392, doi:10.1016/j.chom.2014.02.005 (2014).  
17  
18  
19  
20 474 6 Imhann, F. *et al.* Interplay of host genetics and gut microbiota underlying the onset  
21  
22 475 and clinical presentation of inflammatory bowel disease. *Gut*,  
23  
24 476 doi:10.1136/gutjnl-2016-312135 (2016).  
25  
26  
27  
28 477 7 Morgan, X. C. *et al.* Dysfunction of the intestinal microbiome in inflammatory bowel  
29  
30 478 disease and treatment. *Genome Biol* **13**, R79, doi:10.1186/gb-2012-13-9-r79 (2012).  
31  
32  
33  
34 479 8 Thorkildsen, L. T. *et al.* Dominant fecal microbiota in newly diagnosed untreated  
35  
36 480 inflammatory bowel disease patients. *Gastroenterol Res Pract* **2013**, 636785,  
37  
38 481 doi:10.1155/2013/636785 (2013).  
39  
40  
41  
42 482 9 Quince, C. *et al.* Extensive modulation of the fecal metagenome in children with  
43  
44 483 Crohn's disease during exclusive enteral nutrition. *The American journal of*  
45  
46 484 *gastroenterology* **110**, 1718-1729 (2015).  
47  
48  
49  
50 485 10 Torres, J., Mehandru, S., Colombel, J. F. & Peyrin-Biroulet, L. Crohn's disease. *Lancet*,  
51  
52 486 doi:10.1016/S0140-6736(16)31711-1 (2016).  
53  
54  
55  
56 487 11 Buchman, A. L. Side effects of corticosteroid therapy. *J Clin Gastroenterol* **33**,  
57  
58 488 289-294 (2001).  
59  
60  
61  
62  
63  
64  
65

1 489 12 Wall, C. L., Day, A. S. & Geary, R. B. Use of exclusive enteral nutrition in adults with  
2  
3 490 Crohn's disease: a review. *World J Gastroenterol* **19**, 7652-7660,  
4  
5  
6 491 doi:10.3748/wjg.v19.i43.7652 (2013).  
7  
8  
9 492 13 Day, A. S. & Lopez, R. N. Exclusive enteral nutrition in children with Crohn's disease.  
10  
11 493 *World J Gastroenterol* **21**, 6809-6816, doi:10.3748/wjg.v21.i22.6809 (2015).  
12  
13  
14 494 14 Kaakoush, N. O. *et al.* Effect of exclusive enteral nutrition on the microbiota of children  
15  
16  
17 495 with newly diagnosed Crohn's disease. *Clinical and translational gastroenterology* **6**,  
18  
19  
20 496 e71 (2015).  
21  
22  
23 497 15 Nielsen, H. B. *et al.* Identification and assembly of genomes and genetic elements in  
24  
25  
26 498 complex metagenomic samples without using reference genomes. *Nat Biotechnol* **32**,  
27  
28  
29 499 822-828, doi:10.1038/nbt.2939 (2014).  
30  
31  
32 500 16 Holmes, I., Harris, K. & Quince, C. Dirichlet multinomial mixtures: generative models  
33  
34 501 for microbial metagenomics. *PLoS One* **7**, e30126, doi:10.1371/journal.pone.0030126  
35  
36 502 (2012).  
37  
38  
39 503 17 Segata, N. *et al.* Metagenomic biomarker discovery and explanation. *Genome Biol* **12**,  
40  
41  
42 504 R60, doi:10.1186/gb-2011-12-6-r60 (2011).  
43  
44  
45 505 18 Atarashi, K. *et al.* Induction of colonic regulatory T cells by indigenous Clostridium  
46  
47  
48 506 species. *Science* **331**, 337-341, doi:10.1126/science.1198469 (2011).  
49  
50  
51 507 19 Raetz, C. R. & Whitfield, C. Lipopolysaccharide endotoxins. *Annu Rev Biochem* **71**,  
52  
53  
54 508 635-700, doi:10.1146/annurev.biochem.71.110601.135414 (2002).  
55  
56  
57 509 20 Park, B. S. *et al.* The structural basis of lipopolysaccharide recognition by the TLR4-  
58  
59 510 MD-2 complex. *nature* **458**, 1191-1195 (2009).  
60  
61  
62  
63  
64  
65

1 511 21 Brix, S., Eriksen, C., Larsen, J. M. & Bisgaard, H. Metagenomic heterogeneity  
2  
3 512 explains dual immune effects of endotoxins. *Journal of Allergy and Clinical*  
4  
5  
6 513 *Immunology* **135**, 277 (2015).  
7  
8  
9 514 22 Puertollano, E., Kolida, S. & Yaqoob, P. Biological significance of short-chain fatty acid  
10  
11 515 metabolism by the intestinal microbiome. *Current opinion in clinical nutrition and*  
12  
13 516 *metabolic care* **17**, 139-144, doi:10.1097/mco.000000000000025 (2014).  
14  
15  
16  
17 517 23 Korem, T. *et al.* Growth dynamics of gut microbiota in health and disease inferred from  
18  
19 518 single metagenomic samples. *Science* **349**, 1101-1106, doi:10.1126/science.aac4812  
20  
21 519 (2015).  
22  
23  
24  
25 520 24 Furusawa, Y. *et al.* Commensal microbe-derived butyrate induces the differentiation of  
26  
27 521 colonic regulatory T cells. *Nature* **504**, 446-450, doi:10.1038/nature12721 (2013).  
28  
29  
30 522 25 Singh, N. *et al.* Activation of Gpr109a, receptor for niacin and the commensal  
31  
32 523 metabolite butyrate, suppresses colonic inflammation and carcinogenesis. *Immunity*  
33  
34 524 **40**, 128-139, doi:10.1016/j.immuni.2013.12.007 (2014).  
35  
36  
37  
38  
39 525 26 Jensen, S. R. *et al.* Distinct inflammatory and cytopathic characteristics of *Escherichia*  
40  
41 526 *coli* isolates from inflammatory bowel disease patients. *International Journal of*  
42  
43 527 *Medical Microbiology* **305**, 925-936 (2015).  
44  
45  
46  
47 528 27 Silverberg, M. S. *et al.* Toward an integrated clinical, molecular and serological  
48  
49 529 classification of inflammatory bowel disease: Report of a Working Party of the 2005  
50  
51 530 Montreal World Congress of Gastroenterology. *Canadian Journal of Gastroenterology*  
52  
53 531 *and Hepatology* **19**, 5A-36A (2005).  
54  
55  
56  
57  
58 532 28 Qin, J. *et al.* A metagenome-wide association study of gut microbiota in type 2  
59  
60

1 533 diabetes. *Nature* **490**, 55-60 (2012).

2

3 534 29 Luo, R. *et al.* SOAPdenovo2: an empirically improved memory-efficient short-read de

4

5

6 535 novo assembler. *GigaScience* **1**, 1 (2012).

7

8

9 536 30 Patil, K. R. & Nielsen, J. Uncovering transcriptional regulation of metabolism by using

10

11 537 metabolic network topology. *Proceedings of the National Academy of Sciences of the*

12

13 538 *United States of America* **102**, 2685-2689 (2005).

14

15

16

17 539 31 Claesson, M. J. *et al.* Gut microbiota composition correlates with diet and health in the

18

19 540 elderly. *Nature* **488**, 178-184, doi:10.1038/nature11319 (2012).

20

21

22 541 32 Li, J. *et al.* An integrated catalog of reference genes in the human gut microbiome.

23

24 542 *Nature biotechnology* **32**, 834-841 (2014).

25

26

27

28 543 33 Le Chatelier, E. *et al.* Richness of human gut microbiome correlates with metabolic

29

30 544 markers. *Nature* **500**, 541-546 (2013).

31

32

33

34 545 34 Zapala, M. A. & Schork, N. J. Multivariate regression analysis of distance matrices for

35

36 546 testing associations between gene expression patterns and related variables.

37

38 547 *Proceedings of the national academy of sciences* **103**, 19430-19435 (2006).

39

40

41

42 548 35 Friedman, J. & Alm, E. J. Inferring correlation networks from genomic survey data.

43

44 549 *PLoS Comput Biol* **8**, e1002687 (2012).

45

46

47 550

48

49 551

50

51

52

53

54

55

56

57

58

59

60

61

62

63

64

65

1 552

2  
3  
4 553 **Figure legends**

5  
6  
7  
8 554 **Figure 1. Clustering of gut microbiota into metacommunities associated with CD. (a)**

9  
10  
11 555 Heatmap of signature microbes for three metacommunities determined by [the](#) DMM model.

12  
13 556 Rows correspond to 85 discriminative MGS<sub>s</sub>, with hierarchical clustering by their relative

14  
15  
16 557 abundances. Taxonomic annotations of these MGS<sub>s</sub> are indicated at the right and colored by

17  
18  
19 558 phylum. Each column corresponds to one sample. The disease status (the first horizontal bar)

20  
21  
22 559 and metacommunity membership (the second horizontal bar) of samples are indicated by

23  
24  
25 560 color at the top, and MD index for each sample is represented by gray scale (the third

26  
27 561 horizontal bar). **(b)** PCoA of the 85 MGS<sub>s</sub> based on Jensen-Shannon distance (JSD). Colors

28  
29  
30 562 indicate metacommunity memberships, and shapes (triangle or round) denote disease states

31  
32  
33 563 (CT or CD).

34  
35  
36 564

37  
38  
39 565 **Figure 2. Functional alterations of the gut microbiota in CD. (a)** Heatmap and hierarchical

40  
41  
42 566 clustering of KEGG pathways that are differentially enriched between the microbiota groups

43  
44  
45 567 identified in Fig 1a. Color scale represents reporter score, and only KEGG pathways with a

46  
47 568 reporter score greater than 1.9 are shown. **(b)** Relative abundances of Gram-negative MGS<sub>s</sub>

48  
49  
50 569 (the first left panel), Gram-positive MGS<sub>s</sub> (the second left panel), penta-acylated LPS

51  
52  
53 570 producing MGS<sub>s</sub> (the middle panel), hexa-acylated LPS producing MGS<sub>s</sub> (the second last

54  
55  
56 571 panel), and the ratio of hexa- to penta-acylated LPS producing MGS<sub>s</sub> (the last panel) across

57  
58  
59 572 different groups. The value of relative abundance was log-transformed. **(c)** Relative

1 573 abundances of genes encoding key enzymes for the biosynthesis of different SCFAs across  
2  
3 574 different microbiota groups. Carbon monoxide dehydrogenase and acetyl CoA synthase  
4  
5  
6 575 complex are crucial for acetic acid production; propionyl-CoA transferase and  
7  
8  
9 576 propionyl-CoA/succinyl-CoA transferase are responsible for propionate acid synthesis;  
10  
11  
12 577 butyryl CoA transferase accounts for butyric acid generation. Their relative abundances were  
13  
14 578 log-transformed. **(b,c)** Statistical comparison by Wilcoxon test followed by a  
15  
16  
17 579 Benjamini-Hochberg correction for significance level; \* $q < 0.2$ ; \*\* $q < 0.1$ ; \*\*\* $q < 0.05$ ;  
18  
19  
20 580 \*\*\*\* $q < 0.001$ .

21  
22  
23 581

24  
25 582 **Figure 3. Reconstruction of microbial interaction networks by CD.** Co-occurrence (blue)  
26  
27  
28 583 relationships and co-exclusion (red) between taxa were estimated by SparCC algorithm, and  
29  
30  
31 584 correlation networks were compared between non-CD samples from metacommunity A (**a**,  
32  
33  
34 585 A-CT) and CD samples from metacommunity C (**b**, C-CD). Only relationships with  
35  
36 586 coefficients above 0.3 are visualized, and the thickness of lines denotes strength of correlation  
37  
38  
39 587 as indicated in the legend. Node size represents mean taxon abundance in networks, and node  
40  
41  
42 588 color represents the growth rate of each species (grey indicates no detection). Taxa of the  
43  
44  
45 589 same bacterial phylum are encircled by dashed lines.

46  
47  
48 590

49  
50 591 **Figure 4. Moderate modification of CD microbiota by EEN treatment.** **(a)** Gut MGS from  
51  
52  
53 592 CD patients (n=14) before and after 14 days of EEN were clustered into metacommunities  
54  
55  
56 593 and visualized as a heatmap representing the 85 discriminative MGSs (as in Fig. 1a). Each  
57  
58  
59 594 column corresponds to one sample. **(b)** PCoA of pre- and post-EEN CD microbiota based on

1 595 Jensen-Shannon distance (JSD). Arrows indicate the shift of position along the first two  
2  
3 596 principal coordinates pre- to post-EEN treatment. The sample whose metacommunity identity  
4  
5  
6 597 changed after EEN treatment is marked with an asterisk (GZCD029). (c) Heatmap and  
7  
8  
9 598 hierarchical clustering KEGG pathways that were enriched or decreased in post- versus  
10  
11  
12 599 pre-EEN. Color scale represents reporter score, and only KEGG pathways with a reporter  
13  
14 600 score greater than 1.9 are shown. (d)  $\text{Log}_{10}$  relative abundances of Gram-negative MGSs (the  
15  
16  
17 601 first left panel), Gram-positive MGSs (the second left panel), penta-acylated LPS producing  
18  
19  
20 602 MGSs (the middle panel), hexa-acylated LPS producing MGSs (the second last panel), and  
21  
22  
23 603 the ratio of hexa- to penta-acylated LPS producing MGS (the last panel) in pre- versus  
24  
25  
26 604 post-EEN. (e)  $\text{Log}_{10}$  relative abundances of genes encoding key enzymes for the biosynthesis  
27  
28  
29 605 of different SCFAs in pre- versus post-EEN, as calculated in Figure 2c. (d,e) Statistical  
30  
31  
32 606 comparison by Wilcoxon test followed by a Benjamini-Hochberg correction for significance  
33  
34 607 level showed no changes between groups.

35  
36 608  
37  
38  
39  
40  
41  
42  
43  
44  
45  
46  
47  
48  
49  
50  
51  
52  
53  
54  
55  
56  
57  
58  
59  
60  
61  
62  
63  
64  
65



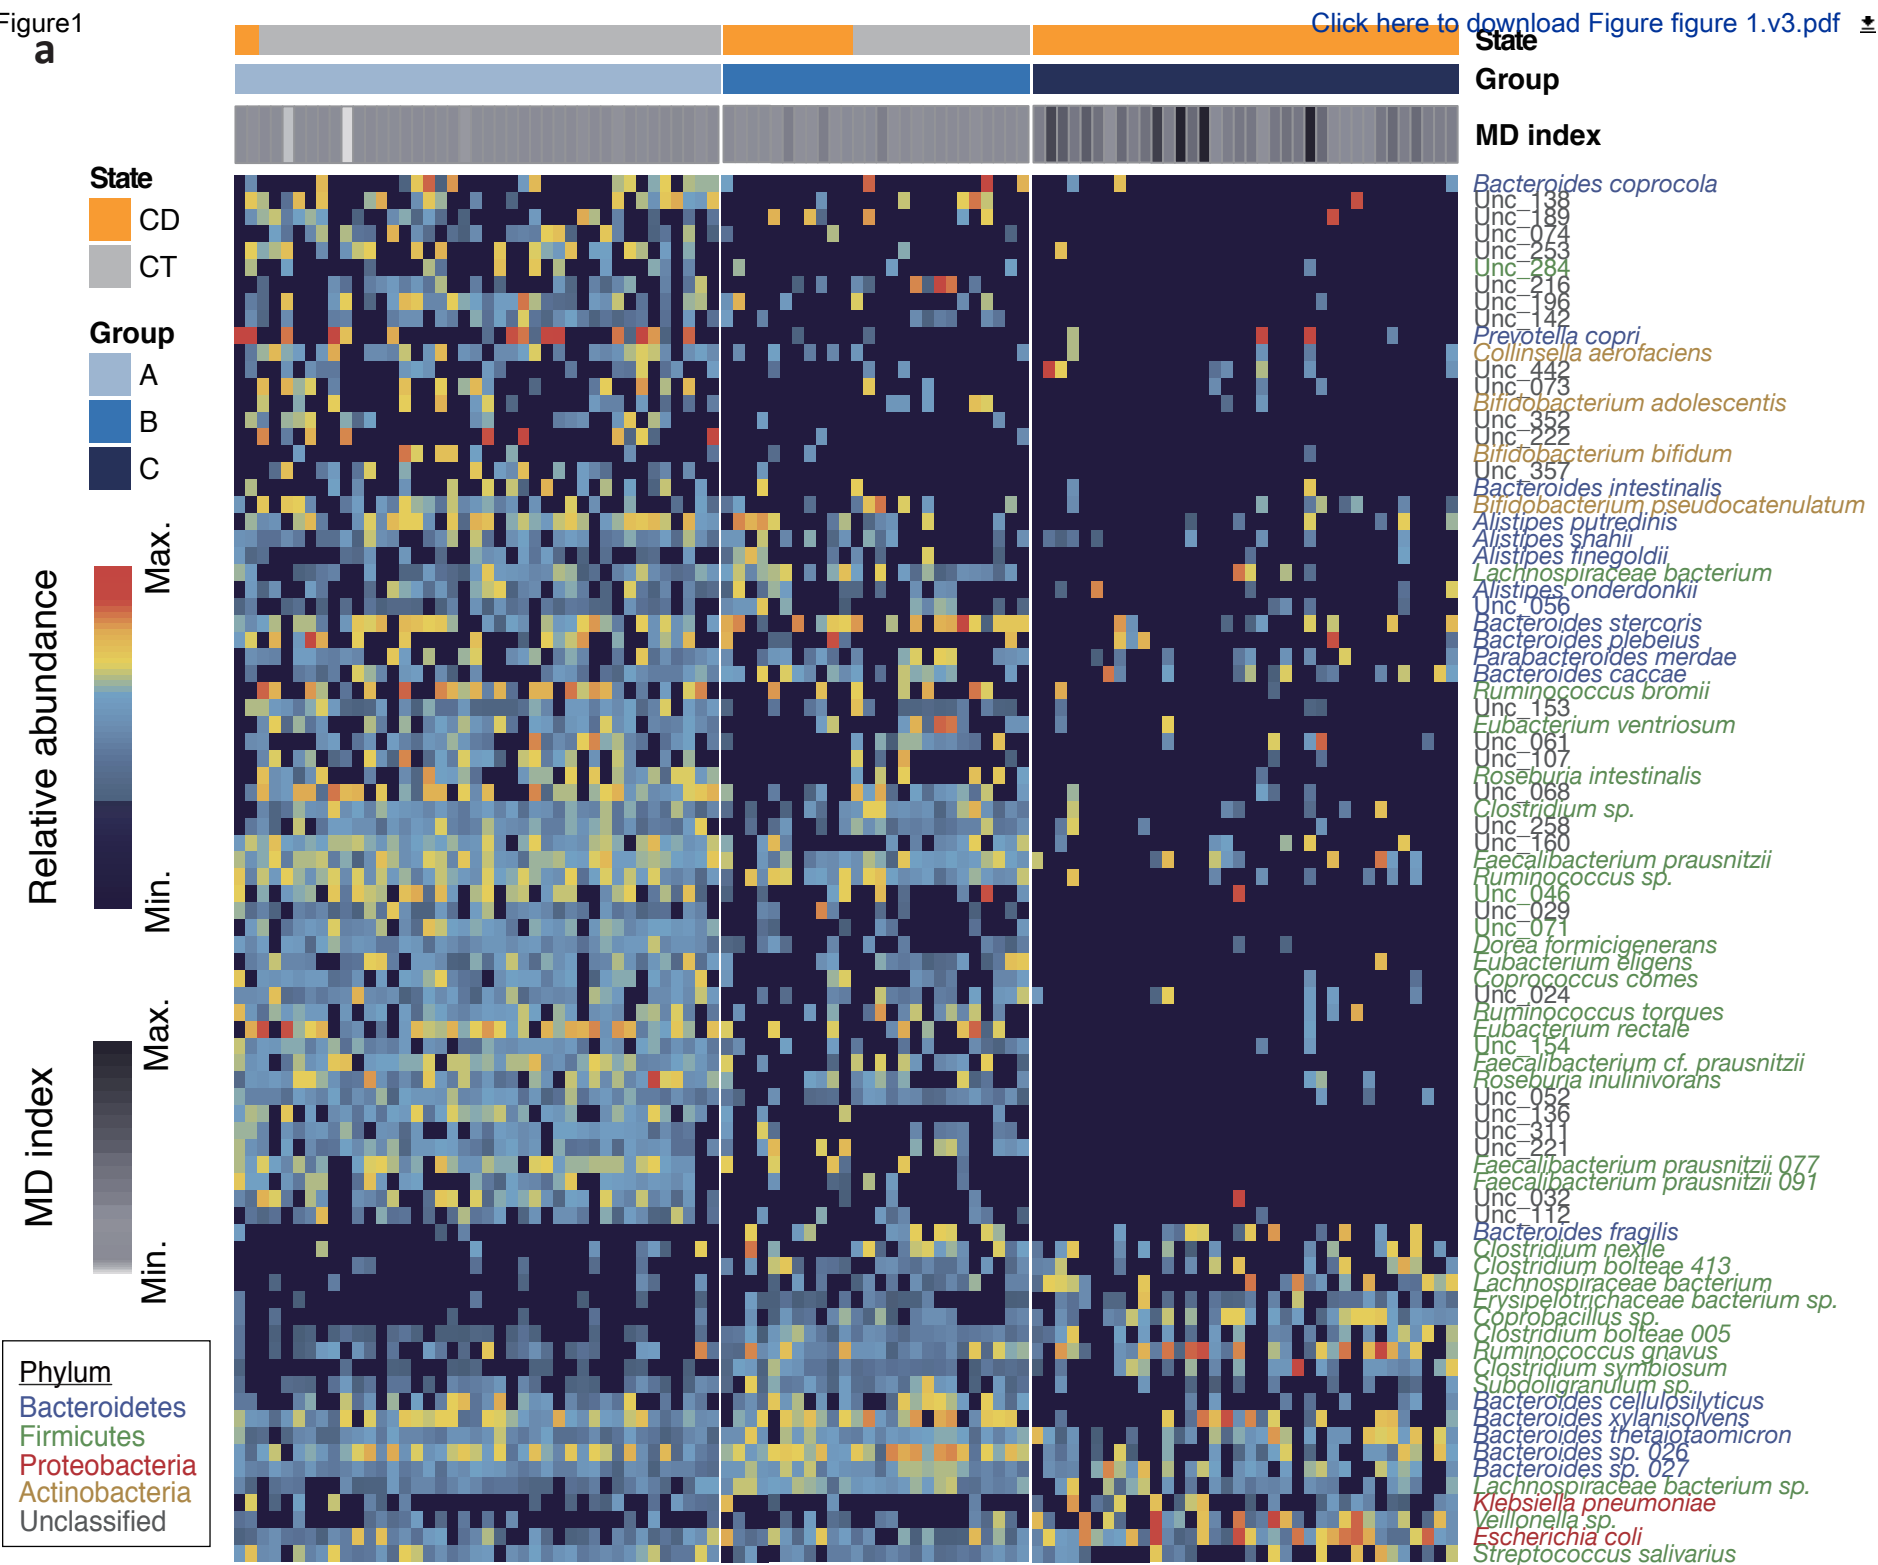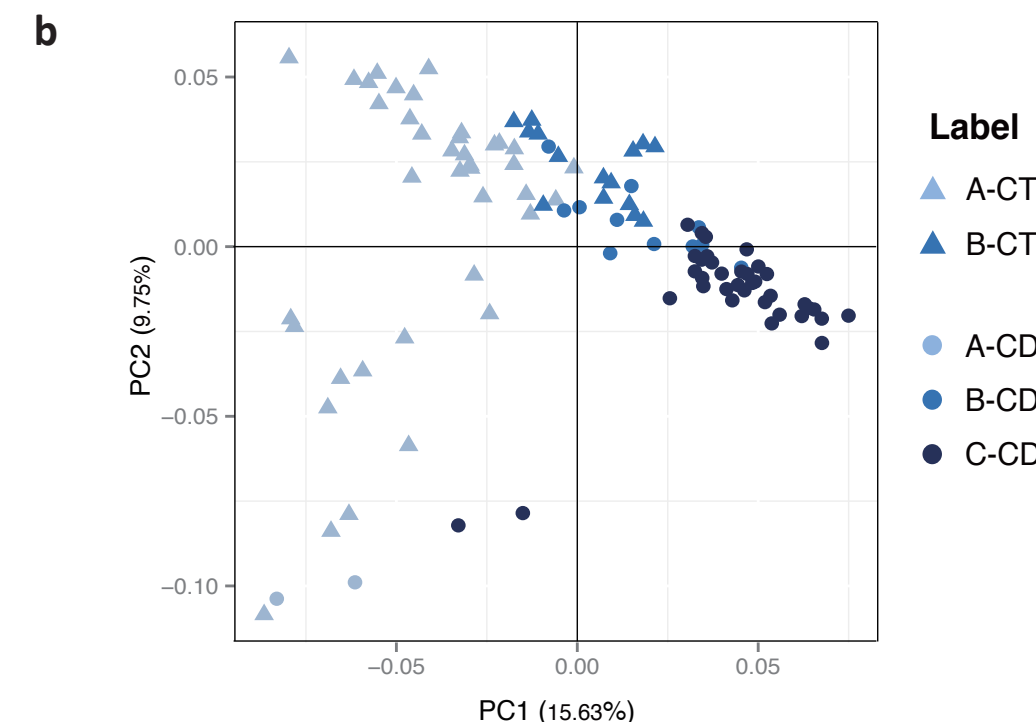

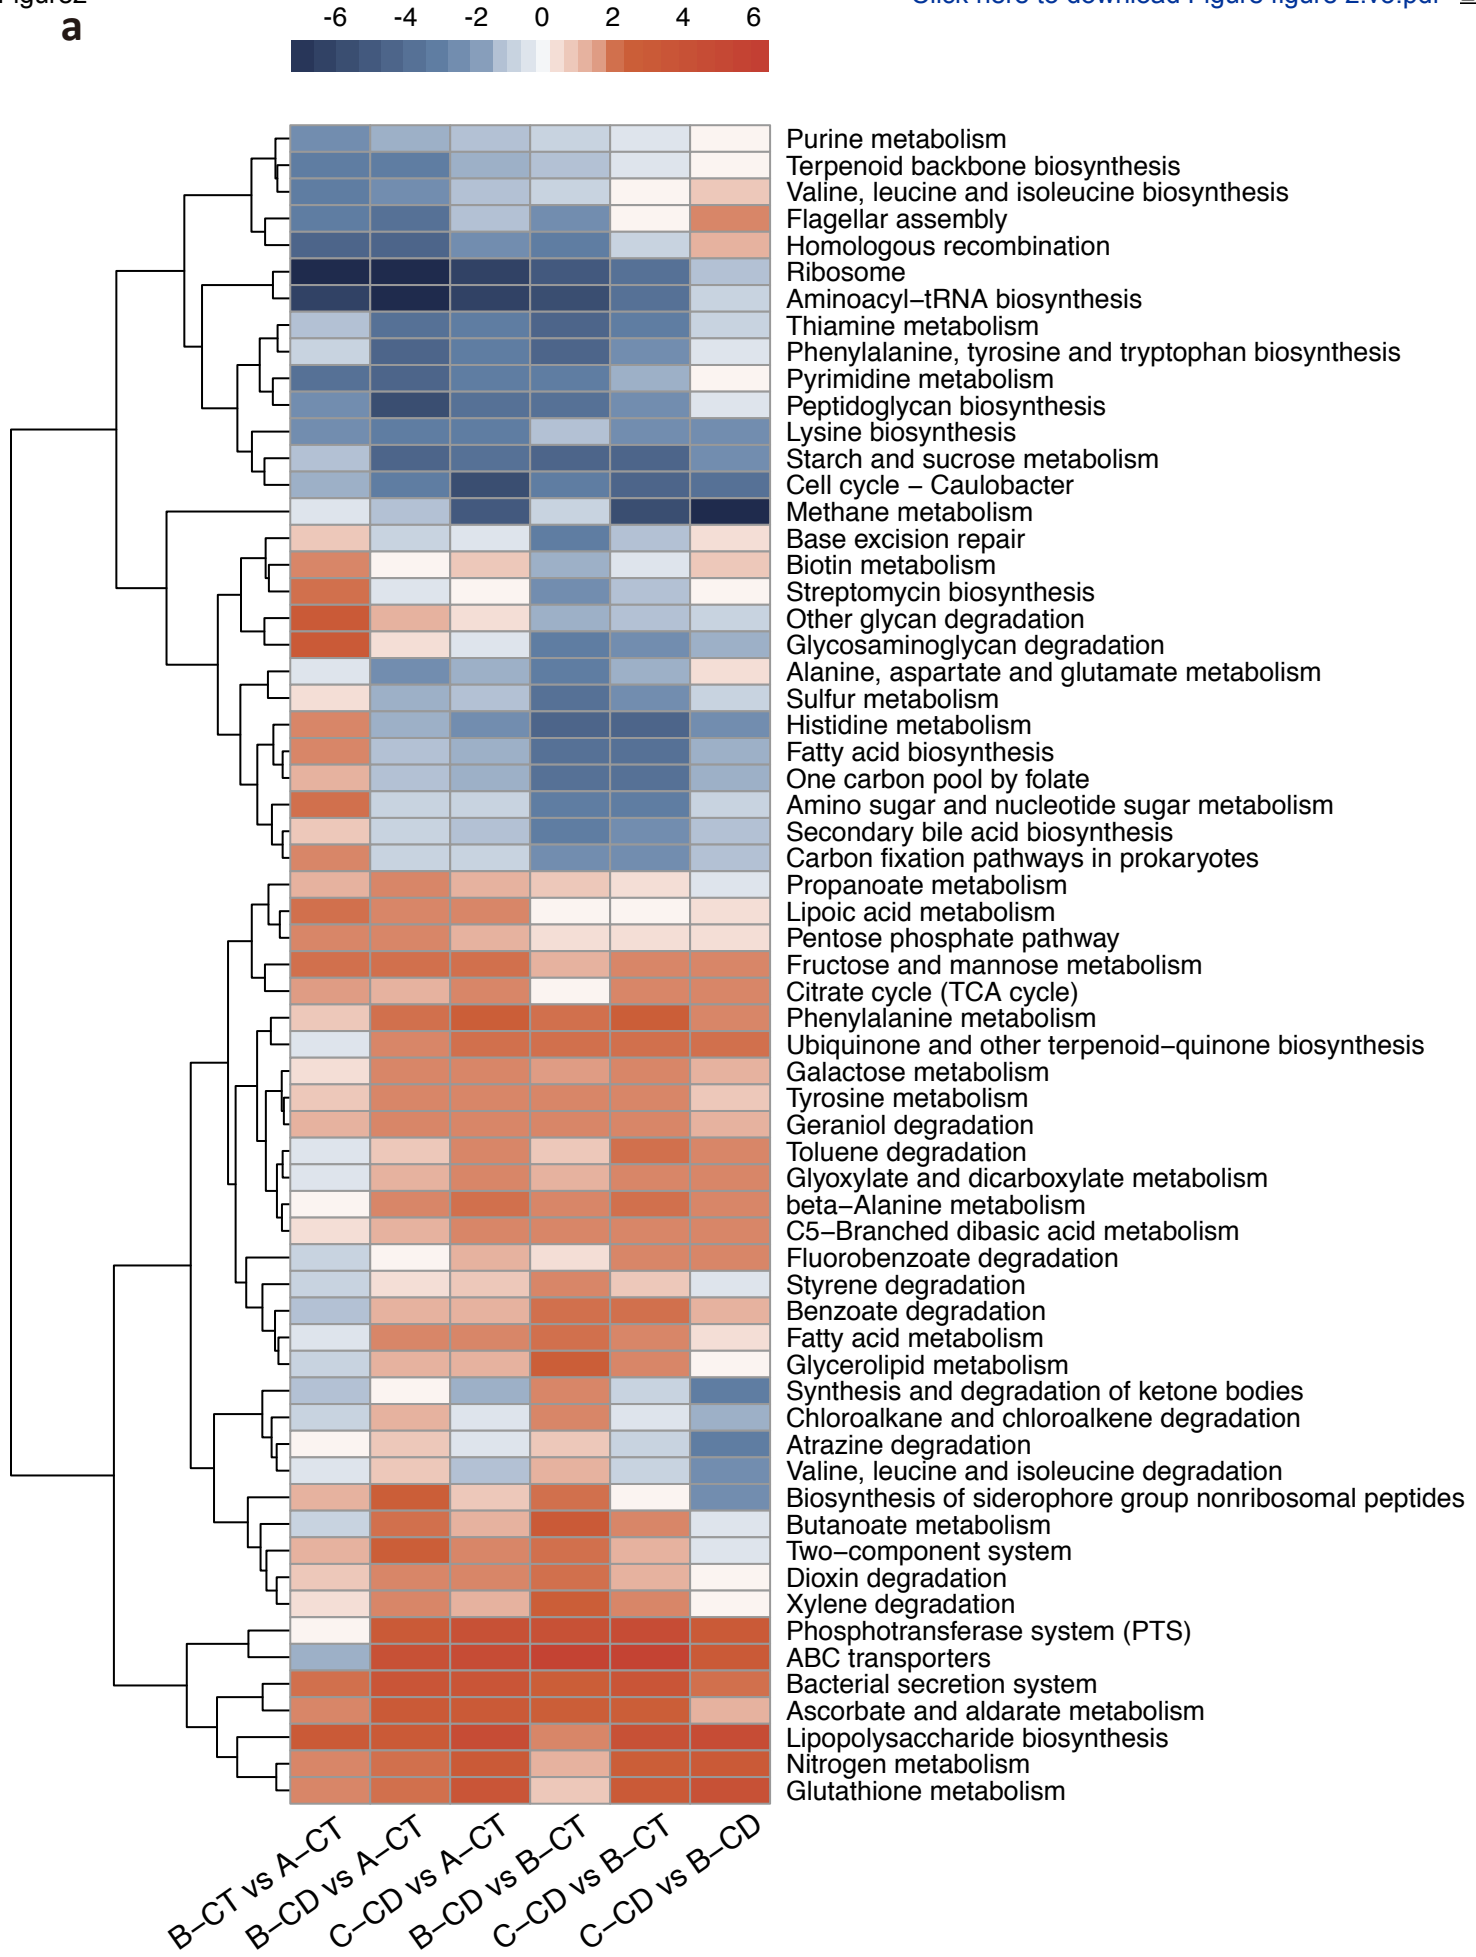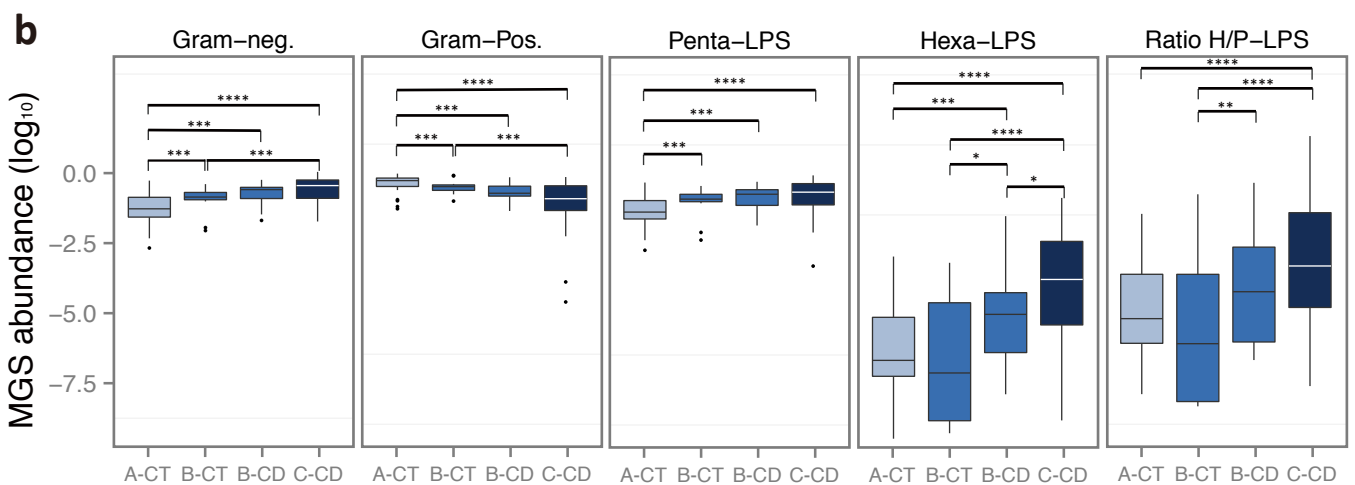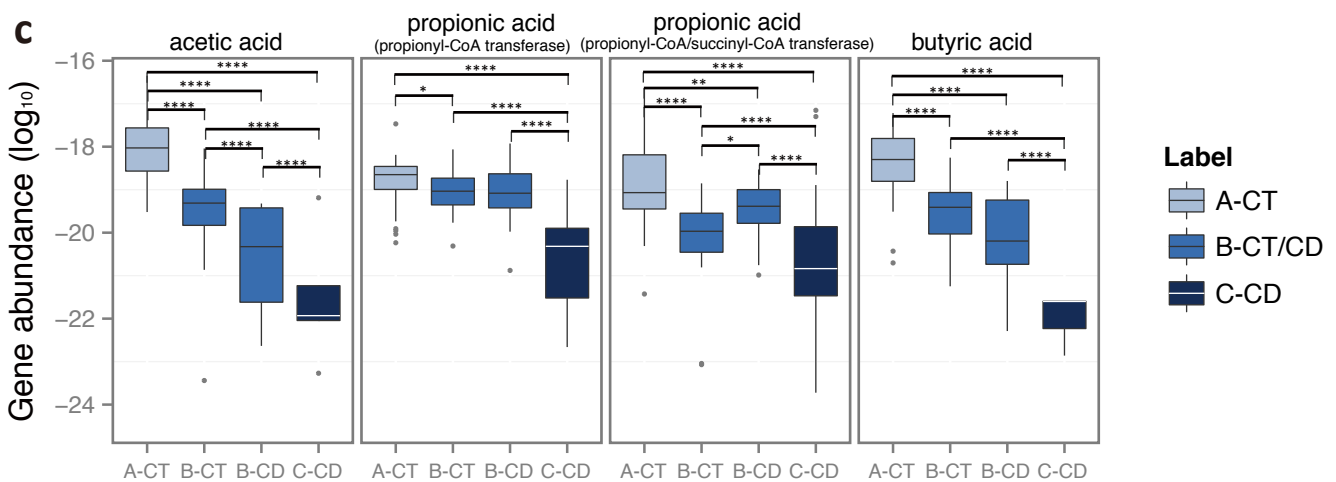

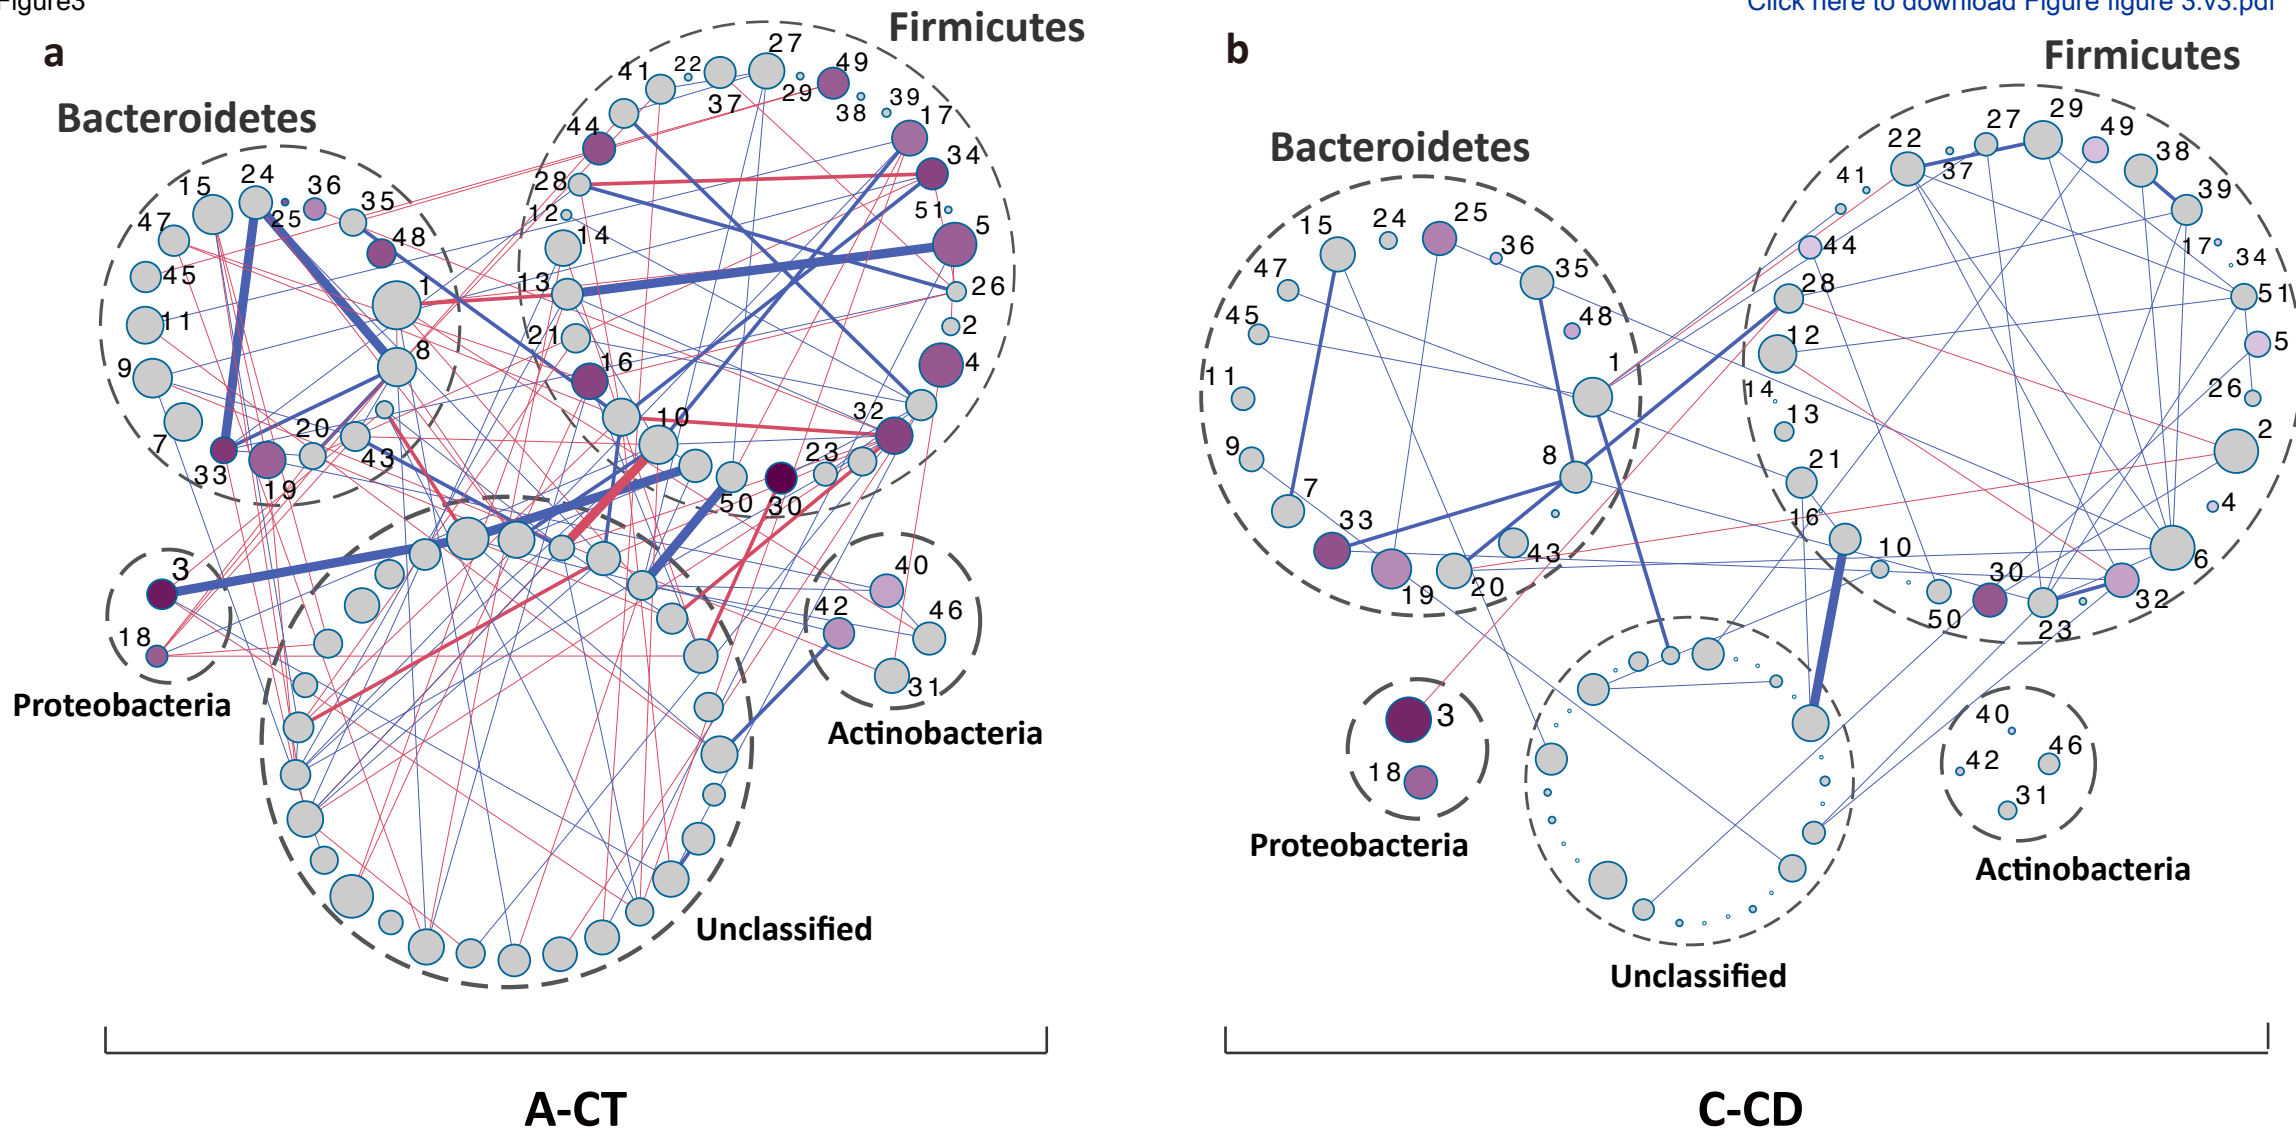1. *Prevotella copri*2. *Veillonella* sp.3. *Escherichia coli*4. *Eubacterium rectale*5. *Ruminococcus bromii*6. *Ruminococcus gnavus*7. *Bacteroides stercoris*8. *Bacteroides* sp. 0269. *Alistipes putredinis*10. *Roseburia inulinivorans*11. *Bacteroides coprocola*12. *Lachnospiraceae* bacterium 10013. *Eubacterium ventriosum*14. *Faecalibacterium* cf. *prausnitzii*15. *Bacteroides plebeius*16. *Faecalibacterium prausnitzii* 07717. *Roseburia intestinalis*18. *Klebsiella pneumoniae*19. *Bacteroides xylanisolvens*20. *Bacteroides* sp. 02721. *Lachnospiraceae* bacterium 06522. *Coprobacillus* sp.23. *Clostridium nexile*24. *Bacteroides cellulosilyticus*25. *Bacteroides fragilis*26. *Subdoligranulum* sp.27. *Ruminococcus* sp.28. *Lachnospiraceae* bacterium sp.29. *Clostridium symbiosum*30. *Streptococcus salivarius*31. *Collinsella aerofaciens*32. *Faecalibacterium prausnitzii* 09434. *Faecalibacterium prausnitzii* 09135. *Bacteroides caccae*36. *Alistipes finegoldii*37. *Coprococcus comes*38. *Clostridium bolteae* 41339. *Clostridium bolteae* 00540. *Bifidobacterium bifidum*41. *Dorea formicigenerans*42. *Bifidobacterium adolescentis*43. *Alistipes onderdonkii*44. *Eubacterium eligens*45. *Bacteroides intestinalis*46. *Bifidobacterium pseudocatenulatum*47. *Parabacteroides merdae*48. *Alistipes shahii*49. *Ruminococcus torques*50. *Clostridium* sp.51. *Erysipelotrichaceae* bacterium sp.

Growth rate

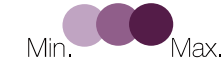

Co-occurring

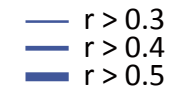

Co-excluding

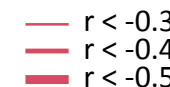

Figure 4

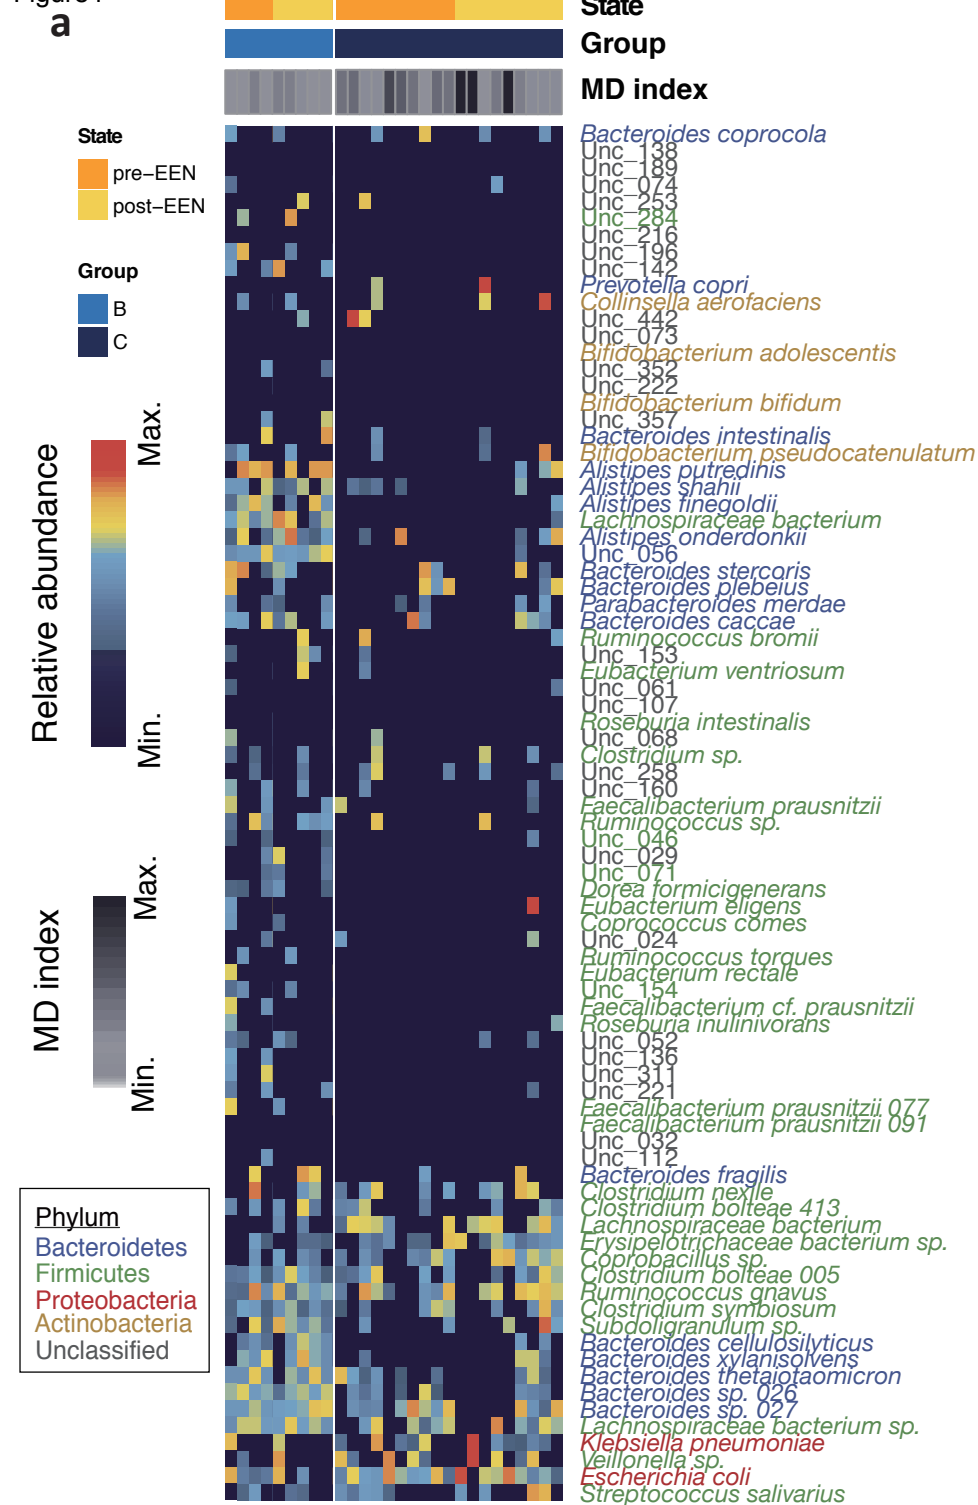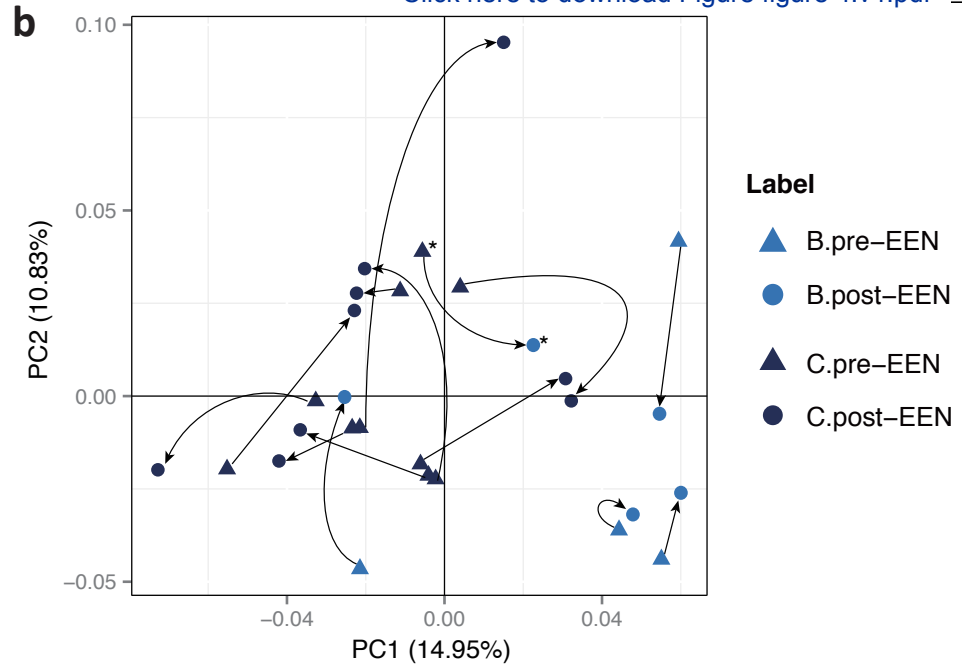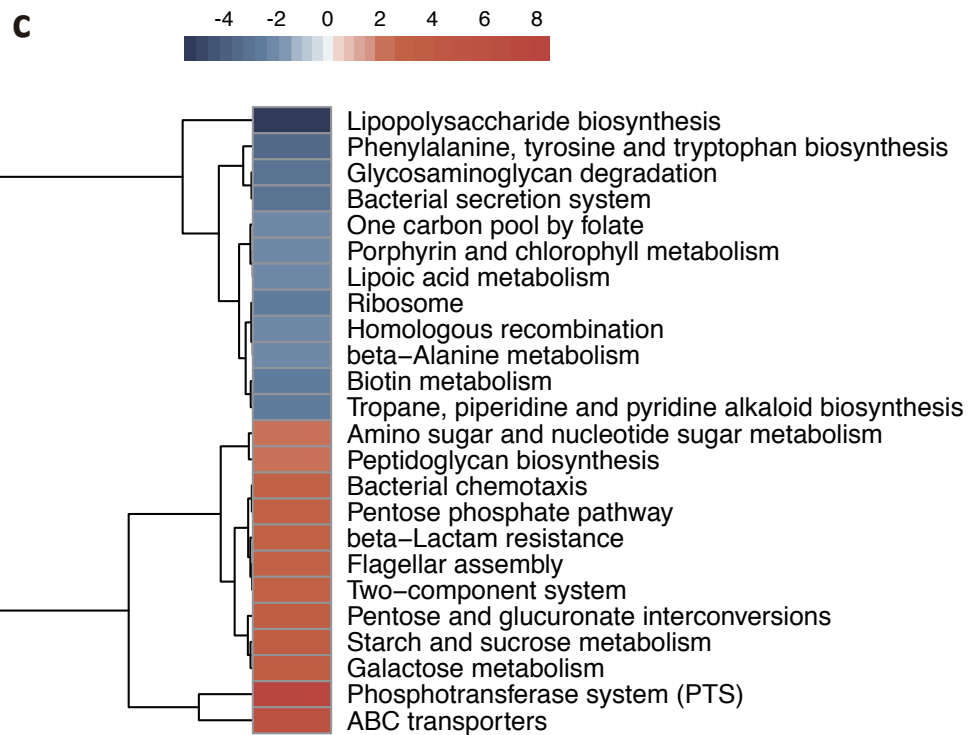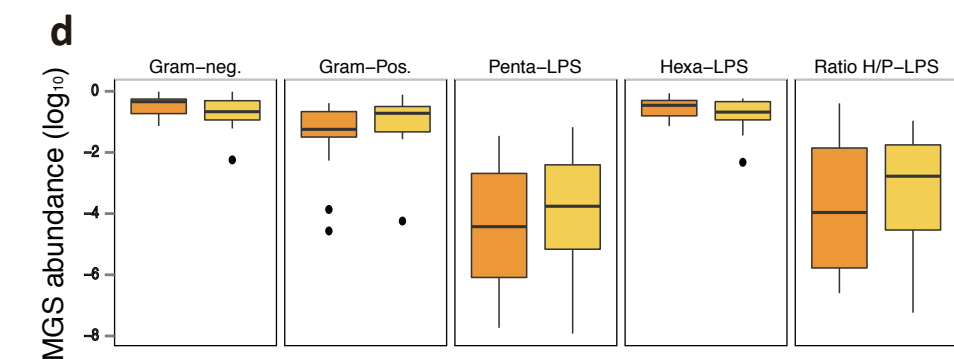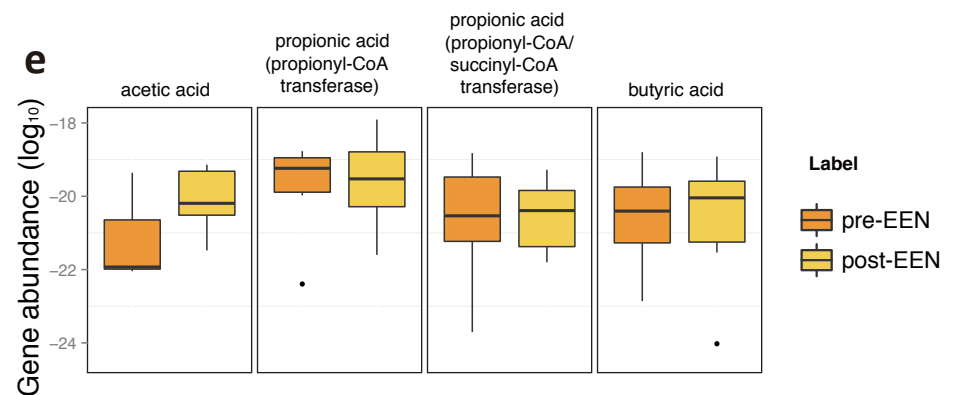

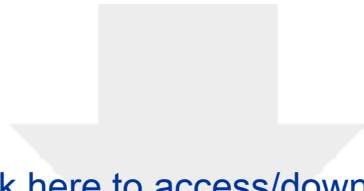

Click here to access/download

**Supplementary Material**

Table & Supplementary Table.CD.xlsx

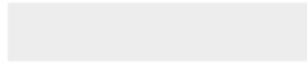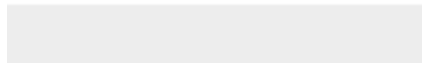

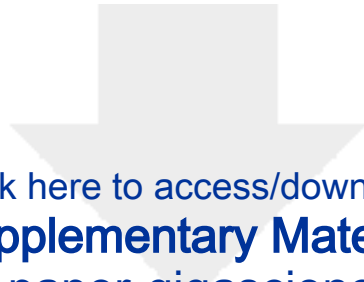

Click here to access/download  
**Supplementary Material**  
SI-CD-paper-gigascience.docx

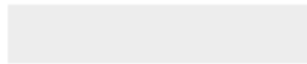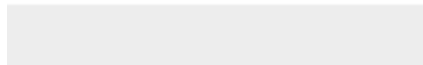

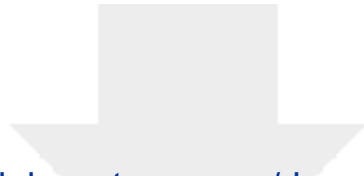

[Click here to access/download](#)

**Supplementary Material**

[GIGA-D-17-00073 pbp response.docx](#)





Click here to access/download  
**Supplementary Material**  
GIGA-D-17-00073 Maaslin.xlsx

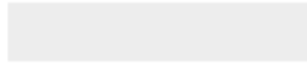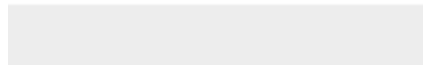

Supplement: gix050_GIGA-D-17-00073_Revision_1.pdf [file gix050_GIGA-D-17-00073_Revision_1.pdf]
