# Supplementary material for: Two distinct metacommunities characterize the gut microbiota in Crohn's disease patients
Source: PubMed Central journal article supplement (PMC5624284; doi:10.1093/gigascience/gix050), 2017-06-26
Supplement: gix050_Response_to_Reviewer_Comments_Revision_1.pdf [file gix050_Response_to_Reviewer_Comments_Revision_1.pdf]

## **Author's Response To Reviewer Comments**

1) Please cite accession numbers or project numbers for the raw data that you say is deposited in the EBI database. The EBI database then needs to be added as a reference in the references list then only the Reference number cited in the main text, after the accession/ project numbers. See my comments.

Thanks for pointing this out. We have inserted the accession numbers for raw data and added EBI database as a reference in the references list.

2) We have added in RRIDs to make your manuscript more reproducible- please do not delete this.

Sure, these RRIDs are remained in manuscript. Many thanks.

\*the DOI Citation of GigaDB is not available right now, so we did not complete the "Available of supporting data" part.
